# Supplementary material for: Evaporation over a glacial lake in Antarctica
Source: Copernicus journal article supplement (doi:10.5194/tc-16-3101-2022), 2022-08-02
Supplement: Supplementary file 1 [file tc-16-3101-2022-supplement.zip]

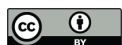

## *Supplement of*

# **Evaporation over a glacial lake in Antarctica**

**Elena Shevnina et al.**

*Correspondence to:* Elena Shevnina ([elena.shevnina@fmi.fi](mailto:elena.shevnina@fmi.fi))

- `tc-16-3101-2022-supplement-title-page.pdf`
- `Bulk_method_results_Irgason_input.txt`
- `Bulk_method_results_Maitri_input.txt`
- `Evaporation_Priyadarshini_Lake_Antarctica_2018_Pankaj.ods`
- `Evaporation_Schirmacher_Oasis_from_ERA5.csv`
- `combination_equations_results.csv`
- `results_code.r`

The copyright of individual parts of the supplement might differ from the article licence.
